# Supplementary material
Source: publisher figshare collection journal article supplement (https://acs.figshare.com/ndownloader/files/13563779)
Supplement: Supplementary file 1 [file 13563779]

## Sheet: Cmpd Characterization Checklist
																				jm-	2018-012622
															Corresponding Author					Matthias.Wymann@UniBas.CH
															Title	Discovery and Preclinical Characterization of 5-[4,6-Bis({3-oxa-8-azabicyclo[3.2.1]octan-8-yl})-1,3,5-triazin-2-yl]-4-(difluoromethyl)pyridin-2-amine (PQR620), a Highly Potent and Selective mTORC1/2 Inhibitor for Cancer and Neurological Disorders
RECOMMENDED COMPOUND CHARACTERIZATION CHECKLIST NOTE: CHECKLIST IS RECOMMENDED BUT NOT REQUIRED
															asfsad
TO DISPLAY INSTRUCTIONS: Double-click HERE (Formula Bar must be visible: Select View>Formula Bar) TO CLOSE: Enter/Return 1. At the upper right, enter the name of the corresponding author and the title of the manuscript. For a new or updated Checklist included with a revision, enter the manuscript ID number next to "jm-". 2. In the left-most column, enter the identifying numbers (or table-entry nu…
COMPOUND				IDENTITY												PURITY					BIOMEDICAL TEST
Compound, structure, or table-entry number		New	Known	Melting point range	IR	UV-Vis	1H NMR	13C NMR		MS	HRMS	Optical rotation/ORD/CD	Enantiomeric/Diastereomeric ratio	X-ray [ORTEP and CIF in SI*]	Copy of 1H/13C NMR spectrum in SI*	<>	Elemental analysis	Quant. GC, HPLC, or electrophoresis	<> Other purity method	<>	In vitro	In vivo	<> Other test	* SI = Supporting Information
PQR309 (1)			X
2		X					X	X			X							X			X	X
PQR620 (3)		X					X	X			X							X			X	X
4			X																		X	X
5			X																		X	X
6		X					X	X			X							X			X	X
7		X					X	X			X							X			X	X
8		X					X	X			X							X			X	X
9		X					X	X			X							X			X	X
10		X					X	X			X							X			X	X
11		X					X	X			X							X			X	X
12		X					X	X			X							X			X	X
13		X					X	X			X							X			X	X
14		X					X	X			X							X			X	X
15		X					X	X			X							X			X	X
16		X					X	X			X							X			X	X
17		X					X	X			X							X			X	X
18		X					X	X			X							X			X	X
19		X					X	X			X							X			X	X
20		X					X	X			X							X			X	X
21		X					X	X			X							X			X	X
22		X					X	X			X							X			X	X
23		X					X	X			X							X			X	X
24		X					X	X			X							X			X	X
25		X					X	X			X							X			X	X
26		X					X	X			X							X			X	X
BKM120 (27)			X																		X	X
28		X					X	X			X							X			X	X
29			X																		X	X
30		X					X	X			X							X			X	X
31		X					X	X			X							X			X	X
32		X					X	X			X							X			X	X
33		X					X	X			X							X			X	X
34		X					X	X			X							X			X	X
